# Supplementary material
Source: Springer Nature journal article supplement (https://www.springermedizin.de/resource/supplementary/13045_2008_42_MOESM3_ESM.pdf/9660534)

**A. Quantification of the levels of  $\gamma$ -globin mRNA in the Oct-1 decoy oligonucleotide-treated K562 cells.**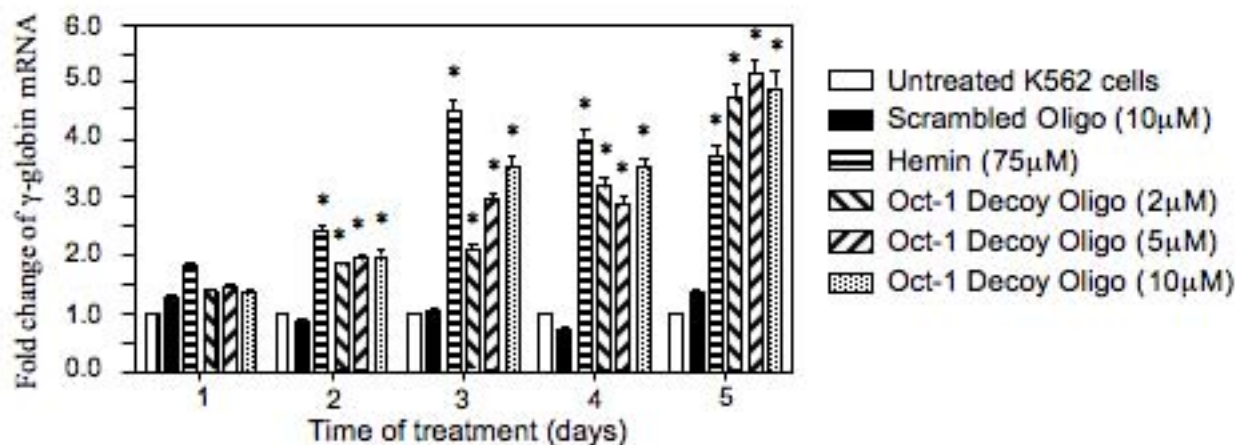**B. Detection of fetal hemoglobin (HbF) in the Oct-1 decoy oligonucleotide-treated K562 cells.**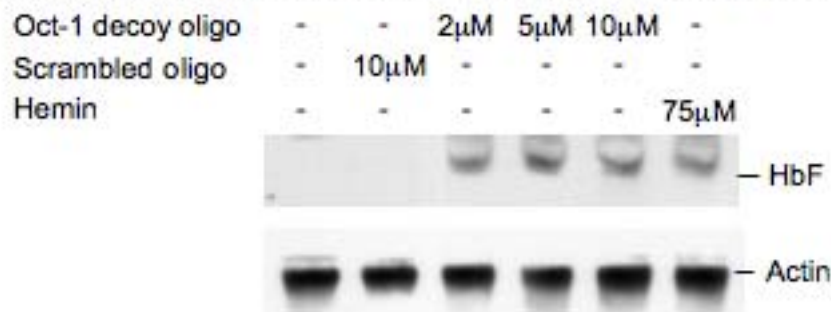

Supplement: MOESM3 [file 9660534]
